# Supplementary material for: A comprehensive HRMS methodology using LC-(ESI)-/GC-(APCI)-QTOF MS complementary platforms for wide-scope target screening of >750 pesticides in olive oil
Source: Royal Society of Chemistry journal article supplement (doi:10.1039/d4ay00181h), 2024-01-01
Supplement: d4ay00181h1.xlsx [file d4ay00181h1.xlsx]

## Sheet: Index
A comprehensive HRMS methodology using LC-(ESI)- / GC-(APCI)-QTOF MS complementary platforms for wide-scope target screening of >750 pesticides in olive oil
Sofia K. Drakopoulou,a Stefanos E. Kokolakis,a Apostolos L. Karagiannidis,a Marilena E. Dasenaki,b Niki C. Maragou,a and Nikolaos S. Thomaidis*a
a Laboratory of Analytical Chemistry, Department of Chemistry, National and Kapodistrian University of Athens, Panepistimiopolis Zografou, 15771 Athens, Greece
b Laboratory of Food Chemistry, Department of Chemistry, National and Kapodistrian University of Athens, Panepistimiopolis Zografou, 15771 Athens, Greece
* Correspondence: ntho@chem.uoa.gr; Tel.: +30 210 7274430
Index (click on the names below to go to the selected sheet)
Table S1. Database of the analytes included in the validation data set, along with information regarding MLOD, MLOQ, MRL and class of each pesticide.
Table S2. Olive oil sampling.
Table S3. List of 771 pesticides constituting the screening database.
Table S4. Validation results: linearity (R2), matrix effect (%ME), accuracy (%R), precision (%RSD).
Figure S1. Evaluation of LC-(ESI)-QTOF MS and GC-(APCI)-QTOF MS sensitivity in terms of calibration slope, by comparing the mean absolute areas in 25 common analytes detected in positive ionization.
Figure S2. Base peak chromatograms of a blank sample from positive ionization in LC-(ESI)-QTOF MS and GC-(APCI)-QTOF MS.
Figure S3. Identification of Pirimimphos methyl, detected in LC-(ESI)-QTOF MS in positive ionization. Detection in A) spiked sample at 50ppb, and B) olive oil sample, along with C) compound's most abundant MS/MS fragments.
Figure S4. Extracted ion chromatograms (EICs) of pesticides detected in olive oil samples, in the cases of LC-(ESI)-QTOF MS (A-C), and GC-(APCI)-QTOF MS (D-E).
Table S5. Quantification results of pesticides in olive oils.

## Sheet: Table S1
Table S3. Database of the analytes included in the validation data set, along with information regarding MLOD, MLOQ, MRL and class of each pesticide.																Return to index
Compound name	CAS number	Molecular Formula	HRMS Analytical Platform	Ionization mode	Retention time (min)	Fragment 1	Fragment 2	Fragment 3	MLOD (mg/kg)	MLOQ (mg/kg)	MRL (mg/kg) Olives for oil production	Median Procesing Factor	MRL (mg/kg) Olive oil	Pesticide Class
2.4-DDT	(789-02-6)	C14H9Cl5	GC-APCI	+	21.16	318.942	165.066	199.028	0.007	0.021	0.05		0.05	Herbicides
4.4-DDD	(72-54-8)	C14H10Cl4	GC-APCI	+	21.08	282.984	165.066	199.028	0.0047	0.0141	0.05		0.05	Insecticides & nematicides
4.4-DDE	(72-55-9)	C14H8Cl4	GC-APCI	+	19.99	245.999	280.966		0.0005	0.0015	0.05		0.05	PCBs and Chlorinated
4.4-DDT	(50-29-3)	C14H9Cl5	GC-APCI	+	22.09	318.942	165.066	199.028	0.011	0.033	0.05		0.05	PCBs and Chlorinated
Acephate	(30560-19-1)	C4H10NO3PS	LC-ESI	-	3.09	140.978	182.005	78.9588	0.001	0.003	0.02		0.02	Organophosphate insecticides
				+	3.11	142.993	124.983	143.995	0.00014	0.00042
			GC-APCI	+	11.506	142.99	112.998	49.0101	0.0026	0.0078
Acrinathrin	(101007-06-1)	C26H21F6NO5	GC-APCI	+	25.293	289.064	208.073	181.063	0.0125	0.0375	0.02		0.02	Pyrethroid insecticide & acaricide
a-HCH	(319-84-6)	C6H6Cl6	GC-APCI	+	14.23	172.963	218.911	180.937	0.008	0.024	0.01		0.01	Organochlorine pesticides (OCPs)
Aldrin	(309-00-2)	C12H8Cl6	GC-APCI	+	17.54	363.872	255.958	292.925	0.0011	0.0033	0.01		0.01	Organochlorine pesticides (OCPs)
Azinphos methyl (Guthion)	(86-50-0)	C10H12N3O3PS2	LC-ESI	+	8.89	132.044	105.045	77.0386	0.0005	0.0015	0.01	2.8	0.028	Organophosphate insecticide
			GC-APCI	+	24.506	132.043	142.99	150.054	0.0014	0.0042
b-HCH	(319-85-7)	C6H6Cl6	GC-APCI	+	14.72	172.963	218.911	180.937	0.0014	0.0042	0.01		0.01	Organochlorine pesticides (OCPs)
Bifenthrin	(82657-04-3)	C23H22ClF3O2	GC-APCI	+	23.482	166.074	179.083	141.062	0.019	0.057	0.02		0.02	Organochlorine pesticides (OCPs)
Bitertanol	(55179-31-2)	C20H23N3O2	LC-ESI	+	11.27	269.154	99.0804	70.04	0.00185	0.00555	0.02		0.02	Fungicides
Bromophos methyl	(2104-96-3)	C8H8BrCl2O3PS	GC-APCI	+	18.178	142.99	352.84	240.86	0.0022	0.0066	0.02		0.02	Organophosphate insecticide
c-HCH	(58-89-9)	C6H6Cl6	GC-APCI	+	14.94	172.963	218.911	180.937	0.0013	0.0039	0.01		0.01	Organochlorine pesticides (OCPs)
Chlorothalonil	(1897-45-6)	C8Cl4N2	GC-APCI	+	15.401	266.884	284.895	265.877	0.00145	0.00435	0.01		0.01	Organochlorine pesticides (OCPs)
Chlordane cis	(5103-71-9)	C10H6Cl8	GC-APCI	+	19.243	265.903	300.872	337.857	0.004	0.012	0.02		0.02	Organochlorine pesticides (OCPs)
Chlordane trans	(57-74-10)	C10H6Cl8	GC-APCI	+	19.58	265.903	285.005	300.872	0.0033	0.0099	0.02		0.02	Organochlorine pesticides (OCPs)
Cyanazine	(21725-46-2)	C9H13ClN6	LC-ESI	-	6.53	212.071			0.00091	0.00273	0.01		0.01	Herbicides
			LC-ESI	+	6.55	214.085	241.096	205.12	0.000275	0.000825
			GC-APCI	+	17.549	214.082	172.034	225.061	0.0023	0.0069
Cyfluthrin	(86560-92-1)	C22H18Cl2FNO3	GC-APCI	+	27.014	433.064	226.063	163.008	0.0036	0.0108	0.02	5.3	0.106	Pyrethroid insecticides
Cyhalothrin-lambda	(76703-62-3)	C23H19ClF3NO4	GC-APCI	+	25.038	450.108	197.032	208.073	0.00031	0.00093	0.5	1	0.5	Pyrethroid insecticides
Cypermethrin	(52315-07-8)	C22H19Cl2NO3	GC-APCI	+	27.51	415.074	163.007	208.073	0.00325	0.00975	0.05	7.6	0.38	Pyrethroid insecticides
Cyproconazole	(94361-06-5)	C15H18ClN3O	LC-ESI	-	9.65				0.011	0.033	0.05		0.05	Organochlorine pesticides (OCPs)
			LC-ESI	+	9.69	70.0397	125.016	138.994	0.0021	0.0063
			GC-APCI	+	20.877	125.014	163.028	177.042	0.005	0.015
Deltamethrin	(52918-63-5)	C22H19Br2NO3	GC-APCI	+	30.845	504.971	252.904	171.984	0.0445	0.1335	0.6		0.6	Organochlorine pesticides (OCPs)
d-HCH	(319-86-8)	C6H6Cl6	GC-APCI	+	15.54	172.963	218.911	180.937	0.0024	0.0072	0.01		0.01	Organochlorine pesticides (OCPs)
Dichlofluanid	(1085-98-9)	C9H11Cl2FN2O2S2	LC-ESI	+	10.02	223.95	269.008	312.963	0.0024	0.0072	0.01		0.01	Fungicides
			GC-APCI	+	17.247	331.962	167.06	123.013	0.0014	0.0042
Dichlorvos	(62-73-7)	C4H7Cl2O4P	LC-ESI	+	7	220.953	127.015	144.982	0.00133	0.00399	0.01		0.01	Organophosphate insecticides
			GC-APCI	+	9.76	184.976	144.982	127.014	0.0018	0.0054
Dicofol	(115-32-2)	C14H9Cl5O	GC-APCI	+	17.78	251.002	215.022	251	0.0125	0.0375	0.05		0.05	Organochlorine pesticides (OCPs)
Dieldrin	(60-57-1)	C12H8Cl6O	GC-APCI	+	20.14	344.898	379.867	290.91	0.00099	0.00297	0.01		0.01	Organochlorine pesticides (OCPs)
Endosulfan alpha	(33213-65-9)	C9H6Cl6O3S	GC-APCI	+	19.45	338.873	306.883	294.883	0.013	0.039	0.05		0.05	Organochlorine pesticides (OCPs)
Endosulfan sulphate	(1031-07-8)	C9H6Cl6O4S	GC-APCI	+	21.97	386.839	228.893	252.893	0.01	0.03	0.05		0.05	Organochlorine pesticides (OCPs)
Endrin	(72-20-8)	C12H8Cl6O	GC-APCI	+	20.69	398.886	379.867		0.0013	0.0039	0.01		0.01	Organochlorine pesticides (OCPs)
Ethalfluralin	(55283-68-6)	C13H14F3N3O4	GC-APCI	+	13.687	333.093	276.056	316.09	0.00105	0.00315	0.01		0.01	Herbicides
Fenamiphos	(22224-92-6)	C13H22NO3PS	LC-ESI	-	10.41				0.002	0.006	0.01		0.01	Organophosphate insecticides
			LC-ESI	+	10.45				0.00125	0.00375
			GC-APCI	+	19.615	304.113	217.006	260.049	0.0007	0.0021
Fenitrothion	(122-14-5)	C9H12NO5PS	LC-ESI	+	9.92				0.0056	0.0168	0.02		0.02	Acaricides
			GC-APCI	+	17.06	277.017	127.015	142.99	0.00475	0.01425
Fenthion	(55-38-9)	C10H15O3PS2	LC-ESI	+	11.02	169.013	279.027	124.981	5e-05	0.00015	0.01		0.01	Organothiophosphate insecticides, avicides & acaricides
			GC-APCI	+	17.7	279.022	127.015	169.01	0.00105	0.00315
Fludioxonil	(131341-86-1)	C12H6F2N2O2	GC-APCI	+	20.31	182.043	154.049	127.041	0.0013	0.0039	0.01		0.01	Fungicides
Heptachlor	(76-44-8)	C10H5Cl7	GC-APCI	+	16.65	371.818	236.838	265.901	0.000225	0.000675	0.01		0.01	Organochlorine pesticides (OCPs)
Heptachlor epoxide	(1024-57-3)	C10H5Cl7O	GC-APCI	+	18.6	387.812	387.812	288.87	0.0011	0.0033	0.01		0.01	Organochlorine pesticides (OCPs)
Hexachlorobenzene	(118-74-1)	C6Cl6	GC-APCI	+	14.34	283.81			0.0004	0.0012	0.01		0.01	Organochlorine pesticides (OCPs)
Hexachlorobutadiene	(87-68-3)	C4Cl6	GC-APCI	+	9.53	224.841	189.872	140.906	0.0013	0.0039	0.01		0.01	Herbicides
Isodrin	(465-73-6)	C12H8Cl6	GC-APCI	+	18.27	327.896	363.872	292.927	0.0008	0.0024	0.01		0.01	Organochlorine pesticides (OCPs)
Malaoxon	(1634-78-2)	C10H19O7PS	LC-ESI	+	7.01	269.024	127.039	99.0076	0.0011	0.0033	0.02		0.02	Organophosphate insecticides
			GC-APCI	+	16.319	314.058	127.015	142.99	0.0043	0.0129
Methacrifos	(62610-77-9)	C7H13O5PS	LC-ESI	-	5.12				0.00385	0.01155	0.02		0.02	Organophosphate insecticides
			LC-ESI	+	8.16	109.005	124.982	209.003	0.00085	0.00255
			GC-APCI	+	12.09	241.029	209.001	142.991	0.00085	0.00255
Methidathion	(950-37-8)	C6H11N2O4PS3	LC-ESI	+	8.7	85.0396	145.007		0.000405	0.001215	0.02		0.02	Organophosphate insecticides
			GC-APCI	+	19.084	145.004	145.004	85.0385	0.012	0.036
Metribuzin	(21087-64-9)	C8H14N4OS	LC-ESI	-	7.04				0.002	0.006	0.2	2.2	0.44	Herbicides
			LC-ESI	+	7.07	187.101	215.096	186.083	0.0048	0.0144
			GC-APCI	+	16.311	214.088	198.066	187.098	0.0016	0.0048
Monocrotophos	(6923-22-4)	C7H14NO5P	LC-ESI	+	4.36	127.016	98.06		0.0018	0.0054	0.02		0.02	Organophosphate insecticides
			GC-APCI	+	13.902	223.06	127.015	164.021	0.0064	0.0192
Myclobutanil	(88671-89-0)	C15H17ClN4	LC-ESI	-	9.71				0.0017	0.0051	0.01		0.01	Fungicides
			LC-ESI	+	9.74	70.04	125.015	220.09	0.00065	0.00195
			GC-APCI	+	20.37	288.113	179.02	125.011	0.00125	0.00375
Omethoate	(1113-02-6)	C5H12NO4PS	LC-ESI	+	3.35	142.992	127.014	154.992	0.00095	0.00285	0.01	0.008	8e-05	Organophosphorous insecticides
			GC-APCI	+	13.031	182.983	142.991	127.015	0.00125	0.00375
Paraoxon	(311-45-5)	C10H14NO6P	LC-ESI	+	8.01	220.001	248.032		0.0036	0.0108	0.02		0.02	Organophosphate insecticides
Paraoxon ethyl	(311-45-5)	C10H14NO6P	GC-APCI	+	16.732	275.055	219.998	174.004	0.0019	0.0057	0.02		0.02	Organophosphate insecticides
Parathion methyl	(298-00-0)	C8H10NO5PS	GC-APCI	+	16.6	263	249.992	264.983	0.00105	0.00315	0.02		0.02	Organophosphate insecticides
Penconazole	(66246-88-6)	C13H15Cl2N3	LC-ESI	+	10.83	70.04	158.976	172.992	0.00099	0.00297	0.01		0.01	Fungicides
			GC-APCI	+	18.64	158.972	160.969	216.968	0.0045	0.0135
Pentabromobenzyl acrylate	(59447-55-1)	C10H5Br5O2	GC-APCI	+	25.88	477.705			0.0013	0.0039	0.01		0.01	Flame retardants
Pentabromoethylbenzene	(85-22-3)	C8H5Br5	GC-APCI	+	21.71	500.634			0.00055	0.00165	0.01		0.01	Flame retardants
Pentachlorobenzene	(608-93-5)	C6HCl5	GC-APCI	+	12.4	249.849	215.888		0.00375	0.01125	0.01		0.01	Fungicides
Phosalone	(2310-17-0)	C12H15ClNO4PS2	LC-ESI	+	11.27				0.0038	0.0114	0.02		0.02	Organophosphate insecticides & acaricides
			GC-APCI	+	24.412	366.986	181.996	181.997	0.00495	0.01485
Phosphamidon (Dimecron)	(13171-21-6)	C10H19ClNO5P	LC-ESI	+	6.26				9e-05	0.00027	0.01		0.01	Organophosphate insecticides
			GC-APCI	+	15.169	127.014	132.057	174.064	0.0013	0.0039
Pirimiphos methyl	(29232-93-7)	C11H20N3O3PS	LC-ESI	+	11.35	164.118	108.056	136.087	0.00065	0.00195	0.01		0.01	Organothiophosphate
			GC-APCI	+	16.971	305.096	164.115	306.103	0.00125	0.00375
Pyrazophos	(13457-18-6)	C14H20N3O5PS	LC-ESI	-	11.36				0.0038	0.0114	0.02		0.02	Fungicides & insecticides
			LC-ESI	+	11.4	222.087	194.056	238.064	0.0033	0.0099
			GC-APCI	+	25.193	373.086	222.085	204.074	0.00495	0.01485
Quinoxyfen	(124495-18-7)	C15H8Cl2FNO	LC-ESI	+	12.78	272.027	196.979	308.004	0.00325	0.00975	0.02		0.02	Fungicides
			GC-APCI	+	22.239	237.057	272.027	238.06	0.0036	0.0108
Simazine	(122-34-9)	C7H12ClN5	LC-ESI	-	7.03				0.0017	0.0051	0.01		0.01	Organochlorine pesticides (OCPs)
			LC-ESI	+	7.07	132.032	124.087	202.085	0.00065	0.00195
			GC-APCI	+	14.657	201.078	202.082	132.032	0.00125	0.00375
Tebuconazole	(107534-96-3)	C16H22ClN3O	LC-ESI	-	10,83	223.089			0.0145	0.0435	0.5	1.9	0.95	Fungicides
			LC-ESI	+	10.87	70.04	308.153	125.015	0.0012	0.0036
			GC-APCI	+	22.565	307.143	250.072	125.014	0.0041	0.0123
Terbufos	(13071-79-9)	C9H21O2PS3	GC-APCI	+	15.048	288.044	230.971	174.906	0.00165	0.00495	0.01		0.01	Insecticides & nematicides
Tetrachlorvinphos (Stirofos)	(22248-79-9)	C10H9Cl4O4P	LC-ESI	+	10.59	127.016	238.898	203.929	0.00065	0.00195	0.01		0.01	Organophosphate insecticides
			GC-APCI	+	19.406	127.015	366.904	364.906	0.00125	0.00375
Trifluralin	(1582-09-8)	C13H16F3N3O4	GC-APCI	+	13.853	248.028	232.03	290.075	0.00095	0.00285	0.01		0.01	Herbicides

## Sheet: Table S2
Table S2. Olive oil sampling.				Return to index
Coding	Geographical origin	Variety
1276	Crete	Koroneiki
1314	Crete	Koroneiki
2052	Crete	Koroneiki
2114	Crete	Koroneiki
2138	Crete	Koroneiki
2182	Crete	Koroneiki
3095	Peloponnese	Koroneiki
3274	Peloponnese	Koroneiki
4134	Peloponnese	Koroneiki
7021	Lesvos	Koroneiki
7068	Lesvos	Koroneiki
7076	Lesvos	Kolovi
7109	Lesvos	Kolovi
7149	Lesvos	Kolovi
7150	Lesvos	Kolovi
7260	Lesvos	Kolovi
7267	Lesvos	Kolovi
S24	Samos	Throumba
S40	Samos	Throumba
X10	Chios	Throumba

## Sheet: Table S3
Table S3. List of 771 pesticides constituting the screening database.						Return to index
Compound name	Molecular Formula	HRMS Analytical Platform	Ionization mode*
1.2.3.6-Tetrahydrophthalimide (cis-)	C8H9NO2	LC-ESI	+	-
1-Naphthylaceticacid	C12H10O2	LC-ESI	-
2,3,5-Trimethacarb	C11H15NO2	GC-APCI	+
2,4,5,6-Tetrachloro-m-xylene	C8H6Cl4	GC-APCI	+
2.4.5-T	C8H5Cl3O3	LC-ESI	-
2.4.5-T-methylester	C9H7Cl3O3	LC-ESI	+
2.4.6-Trichlorophenol	C6H3Cl3O	LC-ESI	-
2.4-D	C8H6Cl2O3	LC-ESI	+
2.4-DB	C10H10Cl2O3	LC-ESI	+	-
2.4-DB-methylester	C11H12Cl2O3	LC-ESI	+
2.4-D-butylester	C12H14Cl2O3	LC-ESI	+
2.4-DDT	C14H9Cl5	GC-APCI	+
2.4-Dimethylaniline (Metabolite Amitraz)	C8H11N	LC-ESI	+
2.4-D-methylester	C9H8Cl2O3	LC-ESI	+
2-Phenylphenol	C12H10O	LC-ESI	-
3,4,5-Trimethacarb	C11H15NO2	GC-APCI	+
4,4'-Dichlorobenzophenone	C13H8Cl2O1	GC-APCI	+
4.4-DDD	C14H10Cl4	GC-APCI	+
4.4-DDE	C14H8Cl4	GC-APCI	+
4.4-DDT	C14H9Cl5	GC-APCI	+
4-Methoxy-1.3-phenylenediamine	C7H10N2O	LC-ESI	+
Acenapthene	C12H10	GC-APCI	+
Acenapthylene	C12H8	GC-APCI	+
Acephate	C4H10NO3PS	GC-APCI / LC-ESI	+
Acetamiprid	C10H11ClN4	GC-APCI / LC-ESI	+	-
Acetochlor	C14H20ClNO2	GC-APCI / LC-ESI	+
Acibenzolar-S-methyl	C8H6N2OS2	LC-ESI	+
Aclonifen	C12H9ClN2O3	GC-APCI / LC-ESI	+	-
Acrinathrin	C26H21F6NO5	GC-APCI / LC-ESI	+
a-HCH	C6H6Cl6	GC-APCI	+
Alachlor	C14H20ClNO2	GC-APCI / LC-ESI	+
Alanycarb	C17H25N3O4S2	LC-ESI	+
Albendazole	C12H15N3O2S	LC-ESI	+
Aldicarb	C7H14N2O2S	LC-ESI	+
Aldicarb-sulfone (Aldoxycarb)	C7H14N2O4S	LC-ESI	+
Aldicarb-sulfoxide	C7H14N2O3S	LC-ESI	+
Aldrin	C12H8Cl6	GC-APCI	+
Allethrin	C19H26O3	GC-APCI / LC-ESI	+
Allidochlor	C8H12ClNO	LC-ESI	+
Ametryn	C9H17N5S	LC-ESI	+
Amidosulfuron	C9H15N5O7S2	LC-ESI	+
Aminocarb (Metacil)	C11H16N2O2	LC-ESI	+
Amitraz	C19H23N3	LC-ESI	+
Amitrole	C2H4N4	LC-ESI	+	-
Ancymidol	C15H16N2O2	LC-ESI	+
Anilazine	C9H5Cl3N4	LC-ESI	+
Anilofos	C13H19ClNO3PS2	LC-ESI	+	-
Anthracene	C14H10	GC-APCI	+
Asana (Esfenvalerate)	C25H22ClNO3	LC-ESI	+
Aspon	C12H28O5P2S2	LC-ESI	+
Asulam	C8H10N2O4S	LC-ESI	+
Atraton	C9H17N5O	LC-ESI	+
Atrazine	C8H14ClN5	LC-ESI	+	-
Atrazine 2-Hydroxy	C8H15N5O	LC-ESI	+
Atrazine-desethyl	C6H10ClN5	LC-ESI	+	-
Atrazine-desisopropyl	C5H8ClN5	LC-ESI	+	-
Avermectin B1a (Abamectin)	C48H72O14	LC-ESI	+	-
Avermectin B1b (Abamectin)	C47H70O14	LC-ESI	+	-
Azaconazole	C12H11Cl2N3O2	LC-ESI	+
Azadirachtin	C35H44O16	LC-ESI	+
Azamethiphos	C9H10ClN2O5PS	GC-APCI	+
Azimsulfuron	C13H16N10O5S	LC-ESI	+
Azinphos ethyl	C12H16N3O3PS2	LC-ESI	+
Azinphos methyl (Guthion)	C10H12N3O3PS2	GC-APCI / LC-ESI	+
Aziprotryne	C7H11N7S	LC-ESI	+	-
Azoxystrobin	C22H17N3O5	LC-ESI	+
Barban (endo)	C11H9Cl2NO2	LC-ESI	+
BDE 100	C12H5Br5O	GC-APCI	+
BDE 153	C12H4Br6O	GC-APCI	+
BDE 154	C12H4Br6O	GC-APCI	+
BDE 28	C12H7Br3O	GC-APCI	+
BDE 47	C12H6Br4O	GC-APCI	+
BDE 99	C12H5Br5O	GC-APCI	+
Beflubutamid	C18H17F4NO2	GC-APCI / LC-ESI	+	-
Benalaxyl	C20H23NO3	GC-APCI / LC-ESI	+
Benazolin	C9H6ClNO3S	LC-ESI	+	-
Bendiocarb	C11H13NO4	LC-ESI	+
Benfluralin	C13H16F3N3O4	GC-APCI	+
Benfuracarb	C20H30N2O5S	GC-APCI / LC-ESI	+
Benodanil	C13H10INO	LC-ESI	+	-
Benomyl (decomposed to Carbendazim)	C14H18N4O3	LC-ESI	+
Benoxacor	C11H11Cl2NO2	LC-ESI	+	-
Bensulfuron-methyl	C16H18N4O7S	LC-ESI	+
Bensulide	C14H24NO4PS3	LC-ESI	+	-
Bensultap	C17H21NO4S4	LC-ESI	+
Bentazone	C10H12N2O3S	LC-ESI	+
Benthiavalicarb isopropyl	C18H24FN3O3S	LC-ESI	+
Benz[a]anthracene	C18H12	GC-APCI	+
Benzo(a)pyrene	C20H12	GC-APCI	+
Benzo(b)fluoranthene	C20H12	GC-APCI	+
Benzo(g,h,i)perylene	C22H12	GC-APCI	+
Benzo(k)fluoranthene	C20H12	GC-APCI	+
Benzoximate	C18H18ClNO5	LC-ESI	+
Benzoylprop ethyl	C18H17Cl2NO3	LC-ESI	+	-
Benzthiazuron	C9H9N3OS	LC-ESI	+	-
b-HCH	C6H6Cl6	GC-APCI	+
Bifenazate	C17H20N2O3	GC-APCI / LC-ESI	+
Bifenox	C14H9Cl2NO5	LC-ESI	+
Bifenthrin	C23H22ClF3O2	GC-APCI	+
Bioallethrin	C19H26O3	LC-ESI	+
Bioresmethrin	C22H26O3	LC-ESI	+
Bispyribac	C19H18N4O8	LC-ESI	+
Bitertanol	C20H23N3O2	LC-ESI	+
Boscalid	C18H12Cl2N2O	LC-ESI	+
Bromacil	C9H13BrN2O2	LC-ESI	+
Bromadiolone	C30H23BrO4	LC-ESI	+	-
Bromocyclen	C8H5BrCl6	GC-APCI	+
Bromophos (Bromophos methyl)	C8H8BrCl2O3PS	LC-ESI	+
Bromophos ethyl	C10H12BrCl2O3PS	GC-APCI / LC-ESI	+
Bromophos methyl	C8H8BrCl2O3PS	GC-APCI	+
Bromopropylate	C17H16Br2O3	LC-ESI	+
Bromoxynil	C7H3Br2NO	LC-ESI	-
Bromuconazole	C13H12BrCl2N3O	LC-ESI	+
Bupirimate	C13H24N4O3S	GC-APCI / LC-ESI	+	-
Buprofezin	C16H23N3OS	GC-APCI / LC-ESI	+
Butachlor	C17H26ClNO2	LC-ESI	+
Butafenacil	C20H18ClF3N2O6	LC-ESI	+
Butamifos	C13H21N2O4PS	LC-ESI	+
Butocarboxim	C7H14N2O2S	LC-ESI	+
Butocarboxim sulfoxid	C7H14N2O3S	LC-ESI	+
Butoxycarboxim	C7H14N2O4S	LC-ESI	+	-
Butralin	C14H21N3O4	LC-ESI	+
Buturon	C12H13ClN2O	LC-ESI	+	-
Butylate	C11H23NOS	LC-ESI	+
Cadusafos	C10H23O2PS2	GC-APCI / LC-ESI	+
Cambendazol	C14H14N4O2S	LC-ESI	+
Captafol	C10H9Cl4NO2S	LC-ESI	+
Captan	C9H8Cl3NO2S	LC-ESI	+
Carbaryl	C12H11NO2	LC-ESI	+	-
Carbendazim	C9H9N3O2	LC-ESI	+	-
Carbetamide	C12H16N2O3	LC-ESI	+	-
Carbofuran	C12H15NO3	LC-ESI	+
Carbofuran-3-hydroxy	C12H15NO4	LC-ESI	+	-
Carbophenothion	C11H16ClO2PS3	GC-APCI / LC-ESI	+
Carbosulfan	C20H32N2O3S	LC-ESI	+
Carboxin	C12H13NO2S	LC-ESI	+	-
Carfentrazone ethyl	C15H14Cl2F3N3O3	GC-APCI / LC-ESI	+
CGA 321113 (Trifloxystrobin Metabolite)	C19H17F3N2O4	LC-ESI	+	-
c-HCH	C6H6Cl6	GC-APCI	+
Chloramben	C7H5Cl2NO2	LC-ESI	-
Chlorantraniliprole	C18H14BrCl2N5O2	LC-ESI	+
Chlorbromuron	C9H10BrClN2O2	LC-ESI	+	-
Chlorbufam	C11H10ClNO2	LC-ESI	+	-
Chlordimeform	C10H13ClN2	LC-ESI	+
Chlorfenapyr	C15H11BrClF3N2O	GC-APCI	+
Chlorfenprop methyl	C10H10Cl2O2	LC-ESI	+
Chlorfenson.Ovex.chlorfénizon.ephirsulfonate.ovatron	C12H8Cl2O3S	LC-ESI	+
Chlorfenvinphos	C12H14Cl3O4P	GC-APCI / LC-ESI	+
Chlorfluazuron	C20H9Cl3F5N3O3	LC-ESI	+
Chloridazone	C10H8ClN3O	LC-ESI	+	-
Chlorimuron ethyl	C15H15ClN4O6S	LC-ESI	+	-
Chlormequat	C5H13ClN^1+	LC-ESI	+
Chlorobenzilate	C16H14Cl2O3	LC-ESI	+	-
Chlorophacinone	C23H15ClO3	LC-ESI	+	-
Chloropropylate	C17H16Cl2O3	LC-ESI	+	-
Chlorothalonil	C8Cl4N2	GC-APCI	+
Chlorothiamid	C7H5Cl2NS	LC-ESI	+	-
Chlorotoluron	C10H13ClN2O	LC-ESI	+
Chloroxuron (Chloroxifenidim)	C15H15ClN2O2	LC-ESI	+	-
Chlorpropham	C10H12ClNO2	LC-ESI	+	-
Chlorpyriphos	C9H11Cl3NO3PS	GC-APCI / LC-ESI	+
Chlorpyriphos methyl	C7H7Cl3NO3PS	GC-APCI / LC-ESI	+
Chlorsulfuron	C12H12ClN5O4S	LC-ESI	+	-
Chlorthal-dimethyl	C10H6Cl4O4	GC-APCI / LC-ESI	+
Chlorthion	C8H9ClNO5PS	LC-ESI	+
Chlozolinate	C13H11Cl2NO5	GC-APCI	+
Chromafenozide	C24H30N2O3	LC-ESI	+	-
Chrysene	C18H12	GC-APCI	+
Cinidon ethyl	C19H17Cl2NO4	LC-ESI	+
Cinosulfuron	C15H19N5O7S	LC-ESI	+
cis Chlordane	C10H6Cl8	GC-APCI	+
Clethodim	C17H26ClNO3S	LC-ESI	+	-
Climbazole	C15H17ClN2O2	GC-APCI	+
Clodinafop-propargyl	C17H13ClFNO4	LC-ESI	+
Clofentezine	C14H8Cl2N4	LC-ESI	+
Clomazone (Command)	C12H14ClNO2	GC-APCI / LC-ESI	+
Clopyralid	C6H3Cl2NO2	LC-ESI	+	-
Cloquintocet-1-methylhexyl ester	C18H22ClNO3	GC-APCI	+
Clothiandin	C6H8ClN5O2S	LC-ESI	+	-
Coumachlor	C19H15ClO4	LC-ESI	+	-
Coumaphos	C14H16ClO5PS	LC-ESI	+	-
Crimidine	C7H10ClN3	LC-ESI	+
Crotoxyphos	C14H19O6P	LC-ESI	+
Crufomate	C12H19ClNO3P	LC-ESI	+	-
Cyanazine	C9H13ClN6	GC-APCI / LC-ESI	+	-
Cyanofenphos	C15H14NO2PS	LC-ESI	+
Cyanophos	C9H10NO3PS	LC-ESI	+
Cyazofamid	C13H13ClN4O2S	LC-ESI	+
Cycloate	C11H21NOS	LC-ESI	+
Cycloheximide	C15H23NO4	LC-ESI	+	-
Cycloxydim	C17H27NO3S	LC-ESI	+
Cycluron	C11H22N2O	LC-ESI	+
Cyfluthrin (Baythroid)	C22H18Cl2FNO3	GC-APCI / LC-ESI	+
Cyhalothrin-lambda	C23H19ClF3NO3	GC-APCI / LC-ESI	+
Cymoxanil	C7H10N4O3	LC-ESI	+	-
Cypermethrin	C22H19Cl2NO3	GC-APCI / LC-ESI	+
Cyprazin	C9H14ClN5	LC-ESI	+	-
Cyproconazole	C15H18ClN3O	GC-APCI / LC-ESI	+	-
Cyprodinil	C14H15N3	GC-APCI / LC-ESI	+
Cyromazine	C6H10N6	LC-ESI	+
Cythioate	C8H12NO5PS2	LC-ESI	+	-
Daimuron (Dymron)	C17H20N2O	LC-ESI	+	-
Dalapon	C3H4Cl2O2	LC-ESI	-
Dazomet	C5H10N2S2	LC-ESI	+
DEET (Diethyltoluamide)	C12H17NO	LC-ESI	+
Deltamethrin	C22H19Br2NO3	GC-APCI / LC-ESI	+
Demeton	C8H19O3PS2	LC-ESI	+
Demeton-S-methylsulfoxid (Oxydemeton-methyl)	C6H15O4PS2	LC-ESI	+
Desmedipham	C16H16N2O4	LC-ESI	+	-
Desmetryn	C8H15N5S	LC-ESI	+
d-HCH	C6H6Cl6	GC-APCI	+
Diafenthiuron	C23H32N2OS	LC-ESI	+
Dialifos	C14H17ClNO4PS2	LC-ESI	+
Diallate	C10H17Cl2NOS	LC-ESI	+
Diazinon	C12H21N2O3PS	GC-APCI / LC-ESI	+
Diazinon-O-analog	C12H21N2O4P	LC-ESI	+
Dibenzo(a,h)anthracene	C22H14	GC-APCI	+
Dibutylchlorendate	C17H20Cl6O4	LC-ESI	+
Dicamba	C8H6Cl2O3	LC-ESI	+	-
Dicamba methyl	C9H8Cl2O3	LC-ESI	+
Dicapthon	C8H9ClNO5PS	LC-ESI	+
Dichlobenil	C7H3Cl2N	GC-APCI	+
Dichlofenthion	C10H13Cl2O3PS	GC-APCI / LC-ESI	+
Dichlofluanid	C9H11Cl2FN2O2S2	GC-APCI / LC-ESI	+
Dichlormid	C8H11Cl2NO	LC-ESI	+
Dichlorobenzamide	Cl2C6H3CONH2	LC-ESI	+
Dichlorophen	C13H10Cl2O2	LC-ESI	-
Dichlorprop	C9H8Cl2O3	LC-ESI	-
Dichlorprop methyl	C10H10Cl2O3	LC-ESI	+
Dichlorvos	C4H7Cl2O4P	GC-APCI / LC-ESI	+
Diclobutrazol	C15H19Cl2N3O	GC-APCI / LC-ESI	+	-
Diclofop	C15H12Cl2O4	LC-ESI	-
Diclofop methyl	C16H14Cl2O4	GC-APCI / LC-ESI	+
Dicloran	C6H4Cl2N2O2	LC-ESI	+	-
Dicofol	C14H9Cl5O	GC-APCI / LC-ESI	+
Dicrotophos	C8H16NO5P	LC-ESI	+
Dieldrin	C12H8Cl6O	GC-APCI	+
Diethofencarb	C14H21NO4	LC-ESI	+	-
Difenoconazole	C19H17Cl2N3O3	LC-ESI	+	-
Difenoxuron	C16H18N2O3	LC-ESI	+	-
Difenzoquat (Ion 1+)	C17H17N2^1+	LC-ESI	+
Diflubenzuron	C14H9ClF2N2O2	LC-ESI	+	-
Diflufenican	C19H11F5N2O2	GC-APCI / LC-ESI	+	-
Diflufenzopyr	C15H12F2N4O3	LC-ESI	+	-
Dikegulac	C12H18O7	LC-ESI	+	-
Dimefuron	C15H19ClN4O3	LC-ESI	+	-
Dimethachlor	C13H18ClNO2	LC-ESI	+
Dimethenamid	C12H18ClNO2S	GC-APCI / LC-ESI	+
Dimethipin	C6H10O4S2	LC-ESI	+
Dimethirimol	C11H19N3O	LC-ESI	+	-
Dimethoate	C5H12NO3PS2	GC-APCI / LC-ESI	+	-
Dimethomorph	C21H22ClNO4	LC-ESI	+
Dimethylanilin (N.N-)	C8H11N	LC-ESI	+
Dimethylphthalate	C10H10O4	LC-ESI	+
Dimethylvinphos	C10H10Cl3O4P	LC-ESI	+
Dimoxystrobin	C19H22N2O3	GC-APCI / LC-ESI	+	-
Dinex (2-Cyclohexyl-4.6-dinitrophenol)	C12H14N2O5	LC-ESI	-
Diniconazole	C15H17Cl2N3O	LC-ESI	+	-
Dinobuton	C14H18N2O7	LC-ESI	+
Dinocap	C18H24N2O6	LC-ESI	+
Dinoseb	C10H12N2O5	LC-ESI	-
Dinotefuran	C7H14N4O3	LC-ESI	+	-
Dinoterb	C10H12N2O5	LC-ESI	-
Dioxacarb	C11H13NO4	LC-ESI	+
Dioxathion	C12H26O6P2S4	LC-ESI	+
Diphacinone	C23H16O3	LC-ESI	+	-
Diphenamid	C16H17NO	GC-APCI / LC-ESI	+
Diphenylamine	C12H11N	LC-ESI	+
Dipropetryn	C11H21N5S	GC-APCI	+
Diquat (Ion 2+)	C12H12N2^2+	LC-ESI	+
Disulfoton	C8H19O2PS3	LC-ESI	+
Disulfoton-sulfone	C8H19O4PS3	LC-ESI	+
Disulfoton-sulfoxid	C8H19O3PS3	LC-ESI	+
Ditalimfos	C12H14NO4PS	GC-APCI / LC-ESI	+
Dithiopyr	C15H16F5NO2S2	LC-ESI	+
Diuron	C9H10Cl2N2O	LC-ESI	+	-
DNOC (4.6-dinitro-o-cresol)	C7H6N2O5	LC-ESI	+	-
Dodemorph	C18H35NO	LC-ESI	+
Dodine (Ion1+)	C13H30N3^1+	LC-ESI	+
Dyrene (Anilazine)	C9H5Cl3N4	LC-ESI	+	-
Edifenphos	C14H15O2PS2	LC-ESI	+
Emamectin B1a	C49H75NO13	LC-ESI	+
Emamectin B1b	C48H73NO13	LC-ESI	+
Endosulfan alpha	C9H6Cl6O3S	GC-APCI / LC-ESI	+	-
Endosulfan sulphate	C9H6Cl6O4S	GC-APCI / LC-ESI	+	-
Endosulfan-beta	C9H6Cl6O3S	GC-APCI	+
Endothal	C8H10O5	LC-ESI	+	-
Endrin	C12H8Cl6O	GC-APCI	+
EPN	C14H14NO4PS	GC-APCI / LC-ESI	+
Epoxiconazole	C17H13ClFN3O	GC-APCI / LC-ESI	+
EPTC	C9H19NOS	LC-ESI	+
Esfenvalerate/Fenvalerate	C25H22ClNO3	GC-APCI	+
Esprocarb	C15H23NOS	LC-ESI	+
Etaconazole	C14H15Cl2N3O2	GC-APCI / LC-ESI	+
Ethafluralin	C13H14F3N3O4	GC-APCI / LC-ESI	+
Ethiofencarb	C11H15NO2S	LC-ESI	+	-
Ethiofencarb-sulfone	C11H15NO4S	LC-ESI	+
Ethiofencarb-sulfoxide	C11H15NO3S	LC-ESI	+
Ethion	C9H22O4P2S4	GC-APCI / LC-ESI	+
Ethiprole	C13H9Cl2F3N4OS	LC-ESI	+	-
Ethirimol	C11H19N3O	LC-ESI	+	-
Ethofumesate	C13H18O5S	LC-ESI	+
Ethoprop	C8H19O2PS2	LC-ESI	+
Ethoprophos	C8H19O2PS2	GC-APCI / LC-ESI	+
Ethoxyquin	C14H19NO	GC-APCI / LC-ESI	+
Ethoxysulfuron	C15H18N4O7S	LC-ESI	+
Etofenprox	C25H28O3	GC-APCI / LC-ESI	+
Etoxazole	C21H23F2NO2	GC-APCI / LC-ESI	+
Etridiazole	C5H5Cl3N2OS	GC-APCI	+
Etrimfos	C10H17N2O4PS	LC-ESI	+
Famoxadone	C22H18N2O4	LC-ESI	+	-
Famphur	C10H16NO5PS2	GC-APCI / LC-ESI	+
Fenamidone	C17H17N3OS	LC-ESI	+	-
Fenamiphos	C13H22NO3PS	GC-APCI / LC-ESI	+	-
Fenamiphos-sulfone	C13H22NO5PS	GC-APCI / LC-ESI	+	-
Fenarimol	C17H12Cl2N2O	LC-ESI	+	-
Fenazaquin	C20H22N2O	LC-ESI	+
Fenbuconazole	C19H17ClN4	LC-ESI	+
Fenbutatin Oxide	C60H78OSn2	LC-ESI	+
Fenchlorphos	C8H8Cl3O3PS	GC-APCI	+
Fenchlorphos-oxon	C8H8Cl3O4P1	GC-APCI	+
Fenclofos.Ronnel	C8H8Cl3O3PS	LC-ESI	+
Fenfuram	C12H11NO2	LC-ESI	+	-
Fenhexamid	C14H17Cl2NO2	LC-ESI	+	-
Fenitrothion	C9H12NO5PS	GC-APCI / LC-ESI	+
Fenobucarb	C12H17NO2	LC-ESI	+
Fenoprop (Silvex.2.4.5-TP)	C9H7Cl3O3	LC-ESI	-
Fenoprop-methylester (Silvex-methyester)	C10H9Cl3O3	LC-ESI	+
Fenothiocarb	C13H19NO2S	LC-ESI	+
Fenoxaprop-P	C16H12ClNO5	LC-ESI	+	-
Fenoxycarb	C17H19NO4	GC-APCI / LC-ESI	+	-
Fenpiclonil	C11H6Cl2N2	LC-ESI	+	-
Fenpropathrin	C22H23NO3	GC-APCI / LC-ESI	+
Fenpropidin	C19H31N	GC-APCI / LC-ESI	+
Fenpropimorph	C20H33NO	GC-APCI / LC-ESI	+
Fenpyroximate	C24H27N3O4	LC-ESI	+
Fenson	C12H9ClO3S	GC-APCI	+
Fensulfothion	C11H17O4PS2	LC-ESI	+
Fensulfothion-sulfon	C11H17O5PS2	LC-ESI	+
Fenthion	C10H15O3PS2	GC-APCI / LC-ESI	+
Fenthion-oxon	C10H15O4PS	GC-APCI / LC-ESI	+
Fenthion-sulfon	C10H15O5PS2	LC-ESI	+
Fenthion-sulfoxide	C10H15O4PS2	LC-ESI	+
Fentin (triphenylstannylium) (1+)	C18H15Sn^1+	LC-ESI	+
Fenuron	C9H12N2O	LC-ESI	+	-
Fenvalerate	C25H22ClNO3	LC-ESI	+
Fipronil	C12H4Cl2F6N4OS	GC-APCI / LC-ESI	+	-
Fipronil-desulfinyl	C12H4Cl2F6N4	LC-ESI	+
Fipronil-sulfide	C12H4Cl2F6N4S	LC-ESI	+	-
Fipronilsulfone	C12H4Cl2F6N4O2S	LC-ESI	+
Flamprop	C16H13ClFNO3	LC-ESI	+	-
Flamprop-isopropyl	C19H19ClFNO3	LC-ESI	+
Flazasulfuron	C13H12F3N5O5S	LC-ESI	+
Flonicamid	C9H6F3N3O	GC-APCI / LC-ESI	+	-
Florasulam	C12H8F3N5O3S	LC-ESI	+	-
Fluacrypyrim	C20H21F3N2O5	LC-ESI	+
Fluazifop	C15H12F3NO4	LC-ESI	+
Fluazifop-p-butyl	C19H20F3NO4	LC-ESI	+
Fluazinam	C13H4Cl2F6N4O4	LC-ESI	+
Fluazuron	C20H10Cl2F5N3O3	LC-ESI	+	-
Fluchloralin	C12H13ClF3N3O4	GC-APCI / LC-ESI	+	-
Flucycloxuron	C25H20ClF2N3O3	LC-ESI	+	-
Flucythrinate	C26H23F2NO4	GC-APCI / LC-ESI	+
Fludioxonil	C12H6F2N2O2	GC-APCI / LC-ESI	+	-
Flufenacet	C14H13F4N3O2S	GC-APCI / LC-ESI	+
Flufenoxuron	C21H11ClF6N2O3	LC-ESI	+	-
Flufenzine (Diflovidazin)	C14H7F2ClN4	LC-ESI	+
Flumequine	C14H12FNO3	LC-ESI	+
Flumethrin	C28H22Cl2FNO3	LC-ESI	+
Flumetsulam	C12H9F2N5O2S	LC-ESI	+	-
Flumioxazin	C19H15FN2O4	GC-APCI / LC-ESI	+	-
Fluometuron	C10H11F3N2O	GC-APCI / LC-ESI	+	-
Fluopicolide	C14H8Cl3F3N2O1	GC-APCI	+
Fluoranthene	C16H10	GC-APCI	+
Fluorene	C13H10	GC-APCI	+
Fluoroglycofen ethyl	C18H13ClF3NO7	LC-ESI	+
Fluotrimazole	C22H16F3N3	GC-APCI	+
Fluoxastrobin	C21H16ClFN4O5	LC-ESI	+
Fluquinconazole	C16H8Cl2FN5O	LC-ESI	+
Fluridone	C19H14F3NO	LC-ESI	+	-
Flurochloridone	C12H10Cl2F3NO	LC-ESI	+	-
Fluroxypyr	C7H5Cl2FN2O3	LC-ESI	+	-
Flurprimidol	C15H15F3N2O2	LC-ESI	+	-
Flurtamone	C18H14F3NO2	LC-ESI	+	-
Flusilazole	C16H15F2N3Si	GC-APCI / LC-ESI	+
Flutolanil	C17H16F3NO2	GC-APCI / LC-ESI	+	-
Flutriafol	C16H13F2N3O	LC-ESI	+	-
Fluvalinate	C26H22ClF3N2O3	GC-APCI	+
Fluvalinate (tau-)	C26H22ClF3N2O3	LC-ESI	+
Folpet	C9H4Cl3NO2S	GC-APCI	+
Fomesafen	C15H10ClF3N2O6S	LC-ESI	+	-
Fonofos (Dyfonate)	C10H15OPS2	GC-APCI / LC-ESI	+
Forchlorfenuron	C12H10ClN3O	LC-ESI	+	-
Formetanate	C11H15N3O2	LC-ESI	+
Fosthiazate	C9H18NO3PS2	GC-APCI / LC-ESI	+
Fuberidazole	C11H8N2O	LC-ESI	+	-
Furalaxyl	C17H19NO4	GC-APCI / LC-ESI	+
Furathiocarb	C18H26N2O5S	GC-APCI / LC-ESI	+
Furilazole	C11H13Cl2NO3	LC-ESI	+
Gibberellic acid	C19H22O6	LC-ESI	+	-
Glufosinate	C5H12NO4P	LC-ESI	+	-
Halfenprox	C24H23BrF2O3	LC-ESI	+
Halofenozide	C18H19ClN2O2	LC-ESI	+	-
Haloxyfop methyl	C16H13ClF3NO4	LC-ESI	+
Heliotrine	C16H27NO5	LC-ESI	+
Heliotrine-N-oxide	C16H27NO6	LC-ESI	+
Heptachlor	C10H5Cl7	GC-APCI	+
Heptachlor Epoxide	C10H5Cl7O	GC-APCI	+
Heptachloronapthalene (PCN 73)	C10HCl7	GC-APCI	+
Heptenophos	C9H12ClO4P	LC-ESI	+
Hexachlorobenzene	C6Cl6	GC-APCI	+
Hexachlorobutadiene	C4Cl6	GC-APCI	+
Hexachloronapthalene (PCN 66)	C10H2Cl6	GC-APCI	+
Hexachloronapthalene (PCN 67)	C10H2Cl6	GC-APCI	+
Hexaconazole	C14H17Cl2N3O	LC-ESI	+	-
Hexaflumuron	C16H8Cl2F6N2O3	LC-ESI	+	-
Hexazinone	C12H20N4O2	GC-APCI / LC-ESI	+
Hexythiazox	C17H21ClN2O2S	LC-ESI	+
Imazalil	C14H14Cl2N2O	LC-ESI	+
Imazamethabenz methyl	C16H20N2O3	GC-APCI / LC-ESI	+	-
Imazamox	C15H19N3O4	LC-ESI	+	-
Imazapyr	C13H15N3O3	LC-ESI	+	-
Imazaquin	C17H17N3O3	LC-ESI	+	-
Imazethapyr	C15H19N3O3	LC-ESI	+	-
Imazosulfuron	C14H13ClN6O5S	LC-ESI	+
Imibenconazole	C17H13Cl3N4S	LC-ESI	+
Imidacloprid	C9H10ClN5O2	LC-ESI	+	-
Inabenfide	C19H15ClN2O2	LC-ESI	+	-
Indeno(1,2,3-cd)pyrene	C22H12	GC-APCI	+
Indoxacarb	C22H17ClF3N3O7	LC-ESI	+
Iodofenphos	C8H8Cl2IO3PS	GC-APCI	+
Iodofenphos (Jodfenphos)	C8H8Cl2IO3PS	LC-ESI	+
Ioxynil	C7H3I2NO	LC-ESI	-
Iprobenfos	C13H21O3PS	LC-ESI	+
Iprodione	C13H13Cl2N3O3	GC-APCI / LC-ESI	+	-
Iprovalicarb	C18H28N2O3	GC-APCI / LC-ESI	+	-
Isazofos	C9H17ClN3O3PS	GC-APCI / LC-ESI	+
Isocarbamid (Azolamide)	C8H15N3O2	LC-ESI	+
Isocarbophos	C11H16NO4PS	LC-ESI	+
Isodrin	C12H8Cl6	GC-APCI	+
Isofenphos	C15H24NO4PS	GC-APCI / LC-ESI	+	-
Isofenphos methyl	C14H22NO4PS	GC-APCI / LC-ESI	+
Isoprocarb	C11H15NO2	GC-APCI / LC-ESI	+
Isopropalin	C15H23N3O4	LC-ESI	+
Isoproturon	C12H18N2O	LC-ESI	+	-
Isoxaben	C18H24N2O4	LC-ESI	+	-
Isoxadifen ethyl	C18H17NO3	LC-ESI	+
Isoxaflutole	C15H12F3NO4S	LC-ESI	+
Isoxathion	C13H16NO4PS	LC-ESI	+
Ivermectin B1a	C48H74O14	LC-ESI	+
Ivermectin B1b	C47H72O14	LC-ESI	+
Kresoxim methyl	C18H19NO4	LC-ESI	+
Lactofen	C19H15ClF3NO7	LC-ESI	+
Lenacil	C13H18N2O2	LC-ESI	+	-
Leptophos	C13H10BrCl2O2PS	LC-ESI	+
Lethane 384	C9H17NO2S	LC-ESI	+
Linuron	C9H10Cl2N2O2	GC-APCI / LC-ESI	+	-
Lufenuron	C17H8Cl2F8N2O3	LC-ESI	+	-
Lycopsamine	C15H25NO5	LC-ESI	+
Lycopsamine-N-oxide	C15H25NO6	LC-ESI	+
Malaoxon	C10H19O7PS	GC-APCI / LC-ESI	+
Malathion	C10H19O6PS2	GC-APCI / LC-ESI	+
MCPA	C9H9ClO3	LC-ESI	-
MCPA-methylester	C10H11ClO3	LC-ESI	+
MCPB	C11H13ClO3	LC-ESI	+	-
Mecarbam	C10H20NO5PS2	LC-ESI	+
Mecoprop	C10H11ClO3	LC-ESI	+	-
Mecoprop-methylester	C11H13ClO3	LC-ESI	+
Mefenacet	C16H14N2O2S	LC-ESI	+
Mefenpyr-diethyl	C16H18Cl2N2O4	LC-ESI	+
Mefluidide	C11H13F3N2O3S	LC-ESI	+	-
Melamine	C3H6N6	LC-ESI	+
Mepanipyrim	C14H13N3	GC-APCI / LC-ESI	+
Mepronil	C17H19NO2	LC-ESI	+	-
Mercaptobenzothiazole	C7H5NS2	LC-ESI	+	-
Metalaxyl	C15H21NO4	LC-ESI	+
Metamitron	C10H10N4O	LC-ESI	+	-
Metazachlor	C14H16ClN3O	GC-APCI / LC-ESI	+
Metconazole	C17H22ClN3O	GC-APCI / LC-ESI	+	-
Methabenzthiazuron	C10H11N3OS	LC-ESI	+	-
Methacrifos	C7H13O5PS	GC-APCI / LC-ESI	+	-
Methamidophos	C2H8NO2PS	LC-ESI	+
Methidathion	C6H11N2O4PS3	GC-APCI / LC-ESI	+
Methiocarb (Mercaptodimethur)	C11H15NO2S	LC-ESI	+	-
Methiocarb-sulfone	C11H15NO4S	LC-ESI	+
Methiocarb-sulfoxide	C11H15NO3S	LC-ESI	+
Methomyl	C5H10N2O2S	GC-APCI / LC-ESI	+
Methoprene	C19H34O3	LC-ESI	+
Methoprotryne	C11H21N5OS	GC-APCI	+
Methoxychlor (DMTD)	C16H15Cl3O2	GC-APCI	+
Methoxyfenozide	C22H28N2O3	LC-ESI	+	-
Methyl 2-dimethoxyphosphinothioylsulfanylacetate (formothion methanolyse)	C5H11O4PS2	LC-ESI	+
Methyl arachidate	C21H42O2	GC-APCI	+
Methyl behenate	C23H46O2	GC-APCI	+
Methyl decanoate	C11H22O2	GC-APCI	+
Methyl dodecanoate	C13H26O2	GC-APCI	+
Methyl hexanoate	C7H14O2	GC-APCI	+
Methyl myristate	C15H30O2	GC-APCI	+
Methyl palmitate	C17H34O2	GC-APCI	+
Methyl stearate	C19H38O2	GC-APCI	+
Metobromuron	C9H11BrN2O2	LC-ESI	+	-
Metolachlor	C15H22ClNO2	GC-APCI / LC-ESI	+
Metolcarb	C9H11NO2	GC-APCI / LC-ESI	+
Metominostrobin	C16H16N2O3	LC-ESI	+
Metosulam	C14H13Cl2N5O4S	LC-ESI	+	-
Metoxuron	C10H13ClN2O2	LC-ESI	+	-
Metrafenone	C19H21BrO5	LC-ESI	+
Metribuzin	C8H14N4OS	GC-APCI / LC-ESI	+	-
Metsulfuron methyl	C14H15N5O6S	LC-ESI	+	-
Mevinphos	C7H13O6P	GC-APCI / LC-ESI	+
Mexacarbate	C12H18N2O2	LC-ESI	+
MGK-264 P	C17H25NO2	LC-ESI	+
Molinate	C9H17NOS	LC-ESI	+
Monocrotaline	C16H23NO6	LC-ESI	+
Monocrotaline-N-oxide	C16H23NO7	LC-ESI	+
Monocrotophos	C7H14NO5P	GC-APCI / LC-ESI	+
Monolinuron	C9H11ClN2O2	LC-ESI	+	-
Monuron	C9H11ClN2O	LC-ESI	+	-
Myclobutanil	C15H17ClN4	GC-APCI / LC-ESI	+	-
N.N-Dimethyl-N'-p-tolylsulphamide (DMST)	C9H14N2O2S	LC-ESI	+	-
N-2-4-Dimethylphenylformamide (Metabolite Amitraz)	C9H11NO	LC-ESI	+
Naled	C4H7Br2Cl2O4P	LC-ESI	+
Naphthalene	C10H8	GC-APCI	+
Naphthoxyaceticacid (beta-)	C12H10O2	LC-ESI	-
Napropamide	C17H21NO2	GC-APCI / LC-ESI	+
Naptalam (N-1-Naphthylphthalamicacid)	C18H13NO3	LC-ESI	+	-
Neburon	C12H16Cl2N2O	LC-ESI	+	-
Nicosulfuron	C15H18N6O6S	LC-ESI	+	-
Nitenpyram	C11H15ClN4O2	LC-ESI	+	-
Nitrofen	C12H7Cl2NO3	GC-APCI / LC-ESI	+
Nitrothal-isopropyl	C14H17NO6	LC-ESI	+
Norflurazon	C12H9ClF3N3O	GC-APCI / LC-ESI	+	-
Novaluron	C17H9ClF8N2O4	LC-ESI	+
Noviflumuron	C17H7Cl2F9N2O3	LC-ESI	+
Nuarimol	C17H12ClFN2O	LC-ESI	+	-
O.O.O-Triethylphosphorothioate	C6H15O3PS	LC-ESI	+
Octtachloronapthalene	C10Cl8	GC-APCI	+
Ofurace	C14H16ClNO3	LC-ESI	+	-
Omethoate	C5H12NO4PS	GC-APCI / LC-ESI	+
Orbencarb	C12H16ClNOS	LC-ESI	+
Orbencarb	C12H16ClNOS	LC-ESI	+
Oryzalin	C12H18N4O6S	LC-ESI	+	-
Oxadiargyl	C15H14Cl2N2O3	LC-ESI	+
Oxadiazon	C15H18Cl2N2O3	GC-APCI / LC-ESI	+
Oxadixyl	C14H18N2O4	GC-APCI / LC-ESI	+
Oxamyl	C7H13N3O3S	LC-ESI	+
Oxasulfuron	C17H18N4O6S	LC-ESI	+
Oxfendazole	C15H13N3O3S	LC-ESI	+
Oxycarboxin	C12H13NO4S	LC-ESI	+	-
Oxydemeton methyl	C6H15O4PS2	LC-ESI	+
Oxyfluorfen	C15H11ClF3NO4	GC-APCI / LC-ESI	+	-
p.p-Dichlorobenzophenone	C13H8Cl2O	LC-ESI	+
Paclobutrazole	C15H20ClN3O	GC-APCI / LC-ESI	+	-
Paraoxon	C10H14NO6P	GC-APCI / LC-ESI	+
Paraoxon methyl	C8H10NO6P	LC-ESI	+
Parathion	C10H14NO5PS	GC-APCI / LC-ESI	+
Parathion methyl	C8H10NO5PS	GC-APCI / LC-ESI	+
PCB 101	C12H5Cl5	GC-APCI	+
PCB 138	C12H4Cl6	GC-APCI	+
PCB 153	C12H4Cl6	GC-APCI	+
PCB 180	C12H3Cl7	GC-APCI	+
PCB 209	C12Cl10	GC-APCI	+
PCB 28	C12H7Cl3	GC-APCI	+
PCB 52	C12H6Cl4	GC-APCI	+
PCP	C6HCl5O	LC-ESI	-
Pebulate	C10H21NOS	LC-ESI	+
Penconazole	C13H15Cl2N3	GC-APCI / LC-ESI	+
Pencycuron	C19H21ClN2O	LC-ESI	+	-
Pendimethalin	C13H19N3O4	GC-APCI / LC-ESI	+
Penfluron	C15H9F5N2O2	LC-ESI	+	-
Pentabromobenzyl acrylate	C10H5Br5O2	GC-APCI	+
Pentabromoethylbenzene	C8H5Br5	GC-APCI	+
Pentachloroaniline	C6H2Cl5N	GC-APCI	+
Pentachlorobenzene	C6HCl5	GC-APCI	+
Pentachloronapthalene (PCN 52)	C10H3Cl5	GC-APCI	+
Pentachloronapthalene (PCN 54)	C10H3Cl5	GC-APCI	+
Pentachlorothioanisole	C7H3Cl5S1	GC-APCI	+
Pentanochlor	C13H18ClNO	LC-ESI	+	-
Permethrin (cis-)	C21H20Cl2O3	GC-APCI / LC-ESI	+
Perthane	C18H20Cl2	GC-APCI	+
Pethoxamid	C16H22ClNO2	LC-ESI	+
Phenanthrene	C14H10	GC-APCI	+
Phenmedipham	C16H16N2O4	LC-ESI	+	-
Phenothrin (tech)	C23H26O3	GC-APCI / LC-ESI	+
Phenthoate	C12H17O4PS2	GC-APCI / LC-ESI	+
Phorate	C7H17O2PS3	GC-APCI / LC-ESI	+
Phorate-oxon	C7H17O3PS2	LC-ESI	+
Phosalone	C12H15ClNO4PS2	GC-APCI / LC-ESI	+
Phosmet	C11H12NO4PS2	GC-APCI / LC-ESI	+
Phosphamidon (Dimecron)	C10H19ClNO5P	GC-APCI / LC-ESI	+
Phoxim	C12H15N2O3PS	LC-ESI	+
Picloram	C6H3Cl3N2O2	LC-ESI	+	-
Picolinafen	C19H12F4N2O2	LC-ESI	+	-
Piperonylbutoxide	C19H30O5	LC-ESI	+
Pirimicarb	C11H18N4O2	GC-APCI / LC-ESI	+
Pirimicarb-desmethyl	C10H16N4O2	LC-ESI	+
Pirimicarb-desmethyl-formamido	C11H16N4O3	GC-APCI	+
Pirimiphos ethyl	C13H24N3O3PS	GC-APCI / LC-ESI	+
Pirimiphos methyl	C11H20N3O3PS	LC-ESI	+
Pretilachlor	C17H26ClNO2	LC-ESI	+
Prochloraz	C15H16Cl3N3O2	LC-ESI	+
Procymidone	C13H11Cl2NO2	GC-APCI / LC-ESI	+	-
Profenophos	C11H15BrClO3PS	GC-APCI / LC-ESI	+
Profoxydim	C24H32ClNO4S	LC-ESI	+	-
Prohexadione	C10H12O5	LC-ESI	+	-
Promecarb	C12H17NO2	GC-APCI / LC-ESI	+
Prometon	C10H19N5O	GC-APCI / LC-ESI	+
Prometryn (Caparol)	C10H19N5S	LC-ESI	+
Propachlor	C11H14ClNO	GC-APCI / LC-ESI	+
Propamocarb	C9H20N2O2	GC-APCI / LC-ESI	+
Propanil	C9H9Cl2NO	GC-APCI / LC-ESI	+	-
Propaphos	C13H21O4PS	LC-ESI	+
Propaquizafop	C22H22ClN3O5	LC-ESI	+
Propargite	C19H26O4S	LC-ESI	+
Propazine	C9H16ClN5	GC-APCI / LC-ESI	+
Propetamphos	C10H20NO4PS	LC-ESI	+	-
Propham	C10H13NO2	GC-APCI / LC-ESI	+
Propiconazole	C15H17Cl2N3O2	LC-ESI	+
Propoxur	C11H15NO3	LC-ESI	+
Propyzamide (Pronamide)	C12H11Cl2NO	LC-ESI	+	-
Proquinazid	C14H17IN2O2	GC-APCI / LC-ESI	+
Prosulfocarb	C14H21NOS	LC-ESI	+
Prosulfuron	C15H16F3N5O4S	LC-ESI	+
Prothioconazole	C14H15Cl2N3OS	LC-ESI	+
Prothiophos	C11H15Cl2O2PS2	GC-APCI	+
Pymetrozine	C10H11N5O	GC-APCI / LC-ESI	+	-
Pyraclostrobin	C19H18ClN3O4	LC-ESI	+
Pyraflufen ethyl	C15H13Cl2F3N2O4	GC-APCI / LC-ESI	+
Pyrazophos	C14H20N3O5PS	GC-APCI / LC-ESI	+	-
Pyrazoxyfen	C20H16Cl2N2O3	LC-ESI	+
Pyrene	C16H10	GC-APCI	+
Pyrethrin I	C21H28O3	LC-ESI	+
Pyrethrins: Jasmolin II	C22H30O5	LC-ESI	+
Pyrethrins: Cinerin I	C20H28O3	LC-ESI	+
Pyrethrins: Cinerin II	C21H28O5	LC-ESI	+
Pyrethrins: Jasmolin I	C21H30O3	LC-ESI	+
Pyrethrins: Jasmolin II	C22H30O5	LC-ESI	+
Pyributicarb	C18H22N2O2S	LC-ESI	+
Pyridaben	C19H25ClN2OS	LC-ESI	+
Pyridaphenthion	C14H17N2O4PS	LC-ESI	+
Pyridate	C19H23ClN2O2S	LC-ESI	+
Pyrifenox	C14H12Cl2N2O	LC-ESI	+
Pyrimethanil	C12H13N3	GC-APCI / LC-ESI	+
Pyrimidifen	C20H28ClN3O2	LC-ESI	+	-
Pyrimiphos methyl	C11H20N3O3PS	GC-APCI	+
Pyriproxyfen	C20H19NO3	GC-APCI / LC-ESI	+
Quinalphos	C12H15N2O3PS	GC-APCI / LC-ESI	+
Quinclorac	C10H5Cl2NO2	LC-ESI	+	-
Quinmerac	C11H8ClNO2	LC-ESI	+	-
Quinoxyfen	C15H8Cl2FNO	GC-APCI / LC-ESI	+
Quintozene (Pentachloronitrobenzene)	C6Cl5NO2	GC-APCI	+
Quizalofop	C17H13ClN2O4	LC-ESI	+	-
Quizalofop ethyl	C19H17ClN2O4	LC-ESI	+
Rabenzazole	C12H12N4	LC-ESI	+	-
Resmethrin	C22H26O3	LC-ESI	+
Retrorsine	C18H25NO6	LC-ESI	+
Retrorsine-N-oxide	C18H25NO7	LC-ESI	+
Rimsulfuron	C14H17N5O7S2	LC-ESI	+
Rotenone	C23H22O6	LC-ESI	+	-
Schradan	C8H24N4O3P2	LC-ESI	+
Sebuthylazine	C9H16ClN5	LC-ESI	+	-
Secbumeton	C10H19N5O	LC-ESI	+
Senecionine	C18H25NO5	LC-ESI	+
Senecionine-N-oxide	C18H25NO6	LC-ESI	+
Seneciphylline	C18H23NO5	LC-ESI	+
Seneciphylline-N-oxide	C18H23NO6	LC-ESI	+
Senkirkine	C19H27NO6	LC-ESI	+
Sethoxydim	C17H29NO3S	LC-ESI	+	-
Siduron	C14H20N2O	LC-ESI	+	-
Simazine	C7H12ClN5	GC-APCI / LC-ESI	+	-
Simazine 2-Hydroxy	C7H13N5O	LC-ESI	+	-
Simetryn	C8H15N5S	LC-ESI	+
Spinosad A (Spinosyn A)	C41H65NO10	LC-ESI	+
Spinosad D	C42H67NO10	LC-ESI	+
Spinosyn B or K	C40H63NO10	LC-ESI	+
Spirodiclofen	C21H24Cl2O4	GC-APCI / LC-ESI	+
Spiromesifen	C23H30O4	LC-ESI	+
Spirotetramat	C21H27NO5	GC-APCI	+
Spiroxamine	C18H35NO2	LC-ESI	+
Spiroxamine	C18H35N1O2	GC-APCI	+
Sulcotrione	C14H13ClO5S	LC-ESI	+	-
Sulfometuron methyl	C15H16N4O5S	LC-ESI	+	-
Sulfotep	C8H20O5P2S2	GC-APCI / LC-ESI	+
Sulprofos (Bolstar)	C12H19O2PS3	LC-ESI	+
SWEP.MCC	C8H7Cl2NO2	LC-ESI	+	-
TCMTB	C9H6N2S3	LC-ESI	+
Tebuconazole	C16H22ClN3O	GC-APCI / LC-ESI	+	-
Tebufenozide	C22H28N2O2	LC-ESI	+	-
Tebufenpyrad	C18H24ClN3O	GC-APCI / LC-ESI	+	-
Tebupirimphos	C13H23N2O3PS	LC-ESI	+
Tebutame	C15H23NO	LC-ESI	+
Tebuthiuron	C9H16N4OS	LC-ESI	+	-
Tecnazene	C6HCl4NO2	GC-APCI	+
Teflubenzuron	C14H6Cl2F4N2O2	LC-ESI	+	-
Tefluthrin	C17H14ClF7O2	GC-APCI / LC-ESI	+
Temephos	C16H20O6P2S3	LC-ESI	+
TEPP	C8H20O7P2	LC-ESI	+
Tepraloxydim	C17H24ClNO4	LC-ESI	+	-
Terbacil	C9H13ClN2O2	LC-ESI	+	-
Terbufos	C9H21O2PS3	GC-APCI / LC-ESI	+
Terbufossulfone	C9H21O4PS3	LC-ESI	+	-
Terbufos-sulfoxid	C9H21O3PS3	LC-ESI	+
Terbumeton	C10H19N5O	GC-APCI / LC-ESI	+
Terbuthylazine	C9H16ClN5	GC-APCI / LC-ESI	+
Terbutryn	C10H19N5S	GC-APCI / LC-ESI	+
Tetrachloronapthalene (PCN 27)	C10H4Cl4	GC-APCI	+
Tetrachlorvinphos (Stirofos)	C10H9Cl4O4P	GC-APCI / LC-ESI	+
Tetraconazole	C13H11Cl2F4N3O	LC-ESI	+	-
Tetramethrin	C19H25NO4	GC-APCI / LC-ESI	+
Tetrasul	C12H6Cl4S	GC-APCI	+
Thenylchlor	C16H18ClNO2S	LC-ESI	+
Thiabendazole	C10H7N3S	LC-ESI	+	-
Thiacloprid	C10H9ClN4S	LC-ESI	+	-
Thiamethoxam	C8H10ClN5O3S	LC-ESI	+	-
Thiazopyr	C16H17F5N2O2S	LC-ESI	+
Thidiazuron	C9H8N4OS	LC-ESI	+	-
Thifensulfuron methyl	C12H13N5O6S2	LC-ESI	+	-
Thiobencarb	C12H16ClNOS	LC-ESI	+
Thiocyclam	C5H11NS3	LC-ESI	+
Thiodicarb	C10H18N4O4S3	LC-ESI	+
Thiofanox	C9H18N2O2S	LC-ESI	+
Thiometon	C6H15O2PS3	LC-ESI	+
Thionazin (Zinophos)	C8H13N2O3PS	LC-ESI	+	-
Thiophanat ethyl	C14H18N4O4S2	LC-ESI	+
Thiophanate methyl	C12H14N4O4S2	LC-ESI	+	-
Thiram (Tetramethylthiuramdisulfide.TMTD)	C6H12N2S4	LC-ESI	+
Tiocarbazil	C16H25NOS	LC-ESI	+
Tokuthion (Prothiophos)	C11H15Cl2O2PS2	LC-ESI	+
Tolclofos methyl	C9H11Cl2O3PS	GC-APCI / LC-ESI	+
Tolfenpyrad	C21H22ClN3O2	LC-ESI	+	-
Tolyfluanid	C10H13Cl2FN2O2S2	LC-ESI	+
Tralkoxydim	C20H27NO3	LC-ESI	+	-
Tralomethrin	C22H19Br4NO3	LC-ESI	+
trans Chlordane	C10H6Cl8	GC-APCI	+
Transfluthrin	C15H12Cl2F4O2	GC-APCI	+
Triadimefon	C14H16ClN3O2	GC-APCI / LC-ESI	+	-
Triadimenol	C14H18ClN3O2	LC-ESI	+
Triallate	C10H16Cl3NOS	GC-APCI / LC-ESI	+
Triasulfuron	C14H16ClN5O5S	LC-ESI	+	-
Triazamate	C13H22N4O3S	LC-ESI	+	-
Triazophos	C12H16N3O3PS	GC-APCI / LC-ESI	+
Triazoxide	C10H6ClN5O	LC-ESI	+
Tribenuron methyl	C15H17N5O6S	LC-ESI	+
Tribufos (Merphos oxide. DEF)	C12H27OPS3	LC-ESI	+
Trichlorfon (Dylox)	C4H8Cl3O4P	LC-ESI	+
Trichloronapthalene (PCN 13)	C10H5Cl3	GC-APCI	+
Trichloronate	C10H12Cl3O2PS	GC-APCI / LC-ESI	+
Triclocarban	C13H9Cl3N2O	LC-ESI	+
Triclopyr	C7H4Cl3NO3	LC-ESI	+	-
Triclopyr-methylester	C8H6Cl3NO3	LC-ESI	+
Tricyclazole	C9H7N3S	LC-ESI	+
Trietazine	C9H16ClN5	LC-ESI	+
Trifloxystrobin	C20H19F3N2O4	GC-APCI / LC-ESI	+
Trifloxysulfuron	C14H14F3N5O6S	LC-ESI	+	-
Triflumizole	C15H15ClF3N3O	GC-APCI / LC-ESI	+	-
Triflumuron	C15H10ClF3N2O3	LC-ESI	+	-
Trifluralin	C13H16F3N3O4	GC-APCI	+
Triflusulfuron methyl	C17H19F3N6O6S	LC-ESI	+	-
Triforine	C10H14Cl6N4O2	LC-ESI	+	-
Trimethacarb (2.3.5-)	C11H15NO2	LC-ESI	+
Trinexapac ethyl	C13H16O5	LC-ESI	+
Triphenyl phosphate	C18H15O4P	GC-APCI / LC-ESI	+
Triticonazole	C17H20ClN3O	LC-ESI	+	-
Uniconazole	C15H18ClN3O	GC-APCI / LC-ESI	+	-
Vamidothion	C8H18NO4PS2	LC-ESI	+
Vegadex (Sulfallate)	C8H14ClNS2	LC-ESI	+
Vernolate	C10H21NOS	LC-ESI	+
Vinclozolin	C12H9Cl2NO3	GC-APCI / LC-ESI	+
Warfarin	C19H16O4	LC-ESI	+	-
XMC	C10H13NO2	LC-ESI	+
Zoxamide	C14H16Cl3NO2	LC-ESI	+	-
* in the case of LC-ESI HRMS (in GC-APCI-HRMS, analysis is performed exclusively in positive mode)

## Sheet: Table S4
Table S4. Validation results: linearity (R2), matrix effect (%ME), accuracy (%R), precision (%RSD).							Return to index
Compound name	HRMS Analytical Platform	R2	ME (%)	R (%)	RSD (%)
2.4-DDT	GC-APCI	0.991	-73	30.5	12.6
4.4-DDD	GC-APCI	0.98	21	50.4	2.37
4.4-DDE	GC-APCI	0.996	-23	35	7.61
4.4-DDT	GC-APCI	0.97	-99	52.6	6.73
Acephate	LC-ESI	0.9996	-16	86.3	4.19
	GC-APCI	0.993	-19	78.3	11.1
Acrinathrin	GC-APCI	0.997	-23	77.8	14
a-HCH	GC-APCI	0.994	-28	79.7	1.9
Aldrin	GC-APCI	0.994	-63	50.3	6.86
Azinphos methyl (Guthion)	LC-ESI	0.998	-43	79.7	4.93
	GC-APCI	0.991	-67	65	7.23
b-HCH	GC-APCI	0.997	33	50.1	28.4
Bifenthrin	GC-APCI	0.9991	-75	61.4	10.5
Bitertanol	LC-ESI	0.999	-8.3	59.9	1.81
Bromophos methyl	GC-APCI	0.98	-11	61.1	5.76
c-HCH	GC-APCI	0.997	-6.3	70.9	4.44
Chlorothalonil	GC-APCI	0.99	-4.7	43.3	40.4
Chlordane cis	GC-APCI	0.998	4.1	54.3	9.32
Chlordane trans	GC-APCI	0.992	-77	53.8	5.23
Cyanazine	LC-ESI	0.996	-22	92.7	7.89
	GC-APCI	0.98	-63	62.6	4.16
Cyfluthrin	GC-APCI	0.992	-48	67.8	19.7
Cyhalothrin-lambda	GC-APCI	0.991	-34	87.6	12.2
Cypermethrin	GC-APCI	0.9995	-55	83.3	8.11
Cyproconazole	LC-ESI	0.996	-43	58.5	9.21
	GC-APCI	0.99	-7.5	56.6	1.85
Deltamethrin	GC-APCI	0.994	-67	73.1	3.45
d-HCH	GC-APCI	0.996	5.2	64	7.28
Dichlofluanid	LC-ESI	0.99	-88	71.1	1.3
	GC-APCI	0.995	-69	62.8	4.84
Dichlorvos	LC-ESI	0.99	-23	68.2	32.9
	GC-APCI	0.99	-49	57.4	28.7
Dicofol	GC-APCI	0.997	-7.2	34.1	6.9
Dieldrin	GC-APCI	0.998	-41	60.4	15.8
Endosulfan alpha	GC-APCI	0.99	-88	85.1	9.62
Endosulfan sulphate	GC-APCI	0.995	-46	55.8	12.9
Endrin	GC-APCI	0.99	-36	60.4	4.41
Ethalfluralin	GC-APCI	0.99	-19	103	1.18
Fenamiphos	LC-ESI	0.997	-39	45.8	3.18
	GC-APCI	0.992	-75	56.4	13
Fenitrothion	LC-ESI	0.997	-29	76.5	11.5
	GC-APCI	0.992	-34	84	9.9
Fenthion	LC-ESI	0.99	-91	69.9	2.99
	GC-APCI	0.9998	-2.3	73.8	8.43
Fludioxonil	GC-APCI	0.996	-5.2	49.8	30.7
Heptachlor	GC-APCI	0.999	-45	69.3	26.5
Heptachlor epoxide	GC-APCI	0.995	-25	28.2	9.85
Hexachlorobenzene	GC-APCI	0.995	-29	50.5	4.18
Hexachlorobutadiene	GC-APCI	0.99	-82	60.9	2.67
Isodrin	GC-APCI	0.998	-11	59.9	14.6
Malaoxon	LC-ESI	0.996	-4.1	96.2	3.8
	GC-APCI	0.991	60	75.3	4.24
Methacrifos	LC-ESI	0.99	-19	90.4	16.2
	GC-APCI	0.999	-32	107	4.36
Methidathion	LC-ESI	0.99	-64	144	4.28
	GC-APCI	0.995	-7.9	70	5.76
Metribuzin	LC-ESI	0.997	-53	132	1.05
	GC-APCI	0.995	-18	69.4	6.38
Monocrotophos	LC-ESI	0.999	1.1	89.2	20
	GC-APCI	0.992	19	78.8	19.4
Myclobutanil	LC-ESI	0.998	-31	64.5	12
	GC-APCI	0.98	-21	57.3	8.57
Omethoate	LC-ESI	0.999	-6.4	89.8	2.78
	GC-APCI	0.99	-18	84.5	7.39
Paraoxon	LC-ESI	0.998	-45	73.8	2.36
Paraoxon ethyl	GC-APCI	0.992	-68	80	6.4
Parathion methyl	GC-APCI	0.99	-40	79.2	2.71
Penconazole	LC-ESI	0.995	-37	47.2	4.56
	GC-APCI	0.998	-7.5	62.1	9.98
Pentabromobenzyl acrylate	GC-APCI	0.99	-64	25.5	4.89
Pentabromoethylbenzene	GC-APCI	0.99	11	45.2	8.47
Pentachlorobenzene	GC-APCI	0.98	-46	75.5	10.2
Phosalone	LC-ESI	0.98	-33	34.1	11.3
	GC-APCI	0.99	-51	66.1	17.5
Phosphamidon (Dimecron)	LC-ESI	0.992	9.3	85.4	2.98
	GC-APCI	0.993	7.4	71	6.72
Pirimiphos methyl	LC-ESI	0.991	-74	146	4.44
	GC-APCI	0.994	-19	83.2	6.92
Pyrazophos	LC-ESI	0.98	-25	47.5	3.17
	GC-APCI	0.99	-17	80.1	5.19
Quinoxyfen	LC-ESI	0.98	-77	60	3.64
	GC-APCI	0.995	-17	41.7	10.1
Simazine	LC-ESI	0.997	-54	133	1.16
	GC-APCI	0.99	75	68.5	1.73
Tebuconazole	LC-ESI	0.993	-30	47.8	13.3
	GC-APCI	0.996	-24	57.2	7.86
Terbufos	GC-APCI	0.994	-14	81.2	3.89
Tetrachlorvinphos (Stirofos)	LC-ESI	0.99	-38	52.8	6.75
	GC-APCI	0.992	-41	76	3.27
Trifluralin	GC-APCI	0.992	-16	99.4	7.87

## Sheet: Figure S1
							Return to index
Figure S1. Evaluation of LC-(ESI)-QTOF MS and GC-(APCI)-QTOF MS sensitivity in terms of calibration slope, by comparing the mean absolute areas in 25 common analytes detected in positive ionization.

## Sheet: Figure S2
					Return to index
Figure S2. Base peak chromatograms of a blank sample from positive ionization in LC-(ESI)-QTOF MS and GC-(APCI)-QTOF MS

## Sheet: Figure S3
								Return to index
Figure S3. Identification of Pirimimphos-methyl, detected in LC-(ESI)-QTOF MS in positive ionization. Detection in A) spiked sample at 50ppb, and B) olive oil sample, along with C) compound's most abundant MS/MS fragments.

## Sheet: Figure S4
									Return to index
Figure S4. Extracted ion chromatograms (EICs) of pesticides detected in olive oil samples, in the cases of LC-(ESI)-QTOF MS (A-C), and GC-(APCI)-QTOF MS (D-E).

## Sheet: Table S5
Table S5. Quantification results of pesticides in olive oils.																													Return to index
		Samples' coding																				MLOD (mg/kg)	MLOQ (mg/kg)	Recovery (%)	MRL (mg/kg) Olives for oil production	EU MRL Regulation	Processing Factor
	Analyte	1276	1314	2052	2114	2138	2182	3095	3274	4134	7021	7068	7076	7109	7149	7150	7260	7267	S24	S40	X10
LC-(ESI)- QTOF-MS	Esprocarb	0.0039	0.0028	0.0031	0.0024	0.0023	0.0063	0.0041	0.0062	0.003	0.003	0.0027	0.0023	0.0021	0.003	0.0044	0.0045	0.0023	<LOD	<LOD	<LOD	0.00056	0.00168	83.1	NA	NA	NA
	Phosphamidon (Dimecron)	<LOD	0.0025	<LOD	<LOD	<LOD	<LOD	<LOD	0.0021	0.002	0.0025	<LOD	<LOD	<LOD	<LOD	<LOD	<LOD	<LOD	<LOD	<LOD	<LOD	9e-05	0.00027	85.4	0.01	Reg. (EC) No 149/2008	NA
	Pirimiphos methyl	<LOD	<LOD	<LOD	<LOD	<LOD	<LOD	<LOD	<LOD	<LOD	<LOD	<LOD	<LOD	<LOD	<LOD	<LOD	<LOD	<LOD	<LOD	<LOQ	<LOD	0.00065	0.00195	146	0.01	Reg. (EU) No 2016/53	NA
GC-(APCI)- QTOF-MS	Chlorpyrifos ethyl	<LOD	<LOD	<LOD	<LOD	<LOD	<LOD	<LOD	<LOD	<LOD	<LOD	<LOD	<LOD	<LOD	<LOD	<LOD	<LOD	<LOD	<LOQ	<LOD	<LOD	0.0014	0.0044	73.6	0.01	Reg. (EU) 2020/1085	NA
	Cyhalothrin-lambda	<LOD	<LOD	<LOD	<LOD	<LOD	<LOD	<LOD	<LOD	<LOD	<LOD	<LOD	<LOD	<LOD	<LOD	<LOD	<LOD	<LOD	<LOD	<LOD	0.012	0.00031	0.00093	87.6	0.5	Reg. (EU) 2021/590	1
	NA: Not Available
